# Supplementary material for: Hydrophilic and hydrophobic pockets at surfaces of strychninium self-assemblies in pseudopolymorphous crystals of strychninium salts
Source: Royal Society of Chemistry journal article supplement (doi:10.1039/b605203g), 2006-01-01

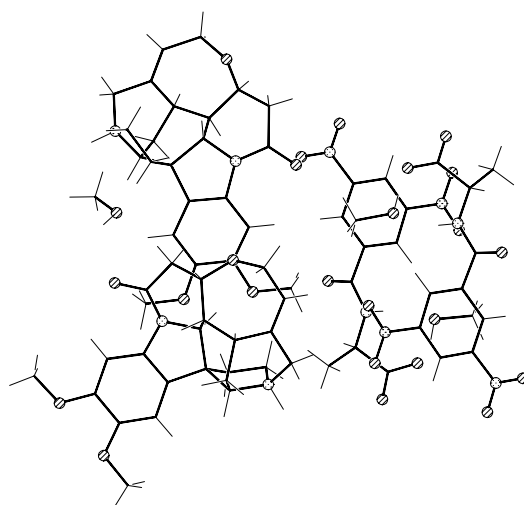

**brucinium *N*-3,5-dinitrobenzoyl-D-alaninate brucinium *N*-3,5-dinitrobenzoyl-L-alaninate methanol trisolvate**

**Crystal data:**  $2(\text{C}_{23}\text{H}_{27}\text{N}_2\text{O}_4^+ \text{C}_{10}\text{H}_8\text{N}_3\text{O}_7^-) \cdot 3\text{CH}_3\text{OH}$ ,  $M = 1451,45$ , orange block, crystal dimensions  $0,30 \times 0,40 \times 0,40$  mm, monoclinic, space group  $P2_1$ ,  $a = 8,7138(9)$ ,  $b = 31,611(3)$ ,  $c = 12,4868(12)$  Å,  $\beta = 92,042(4)^\circ$ ,  $V = 3437,3(6)$  Å<sup>3</sup>,  $Z = 2$ ,  $D_c = 1,402$  Mg m<sup>-3</sup>,  $T = 100(2)$  K,  $R = 0,048$ ,  $wR = 0,095$  (5616 reflections with  $I > 2\sigma(I)$ ) for 937 variables.

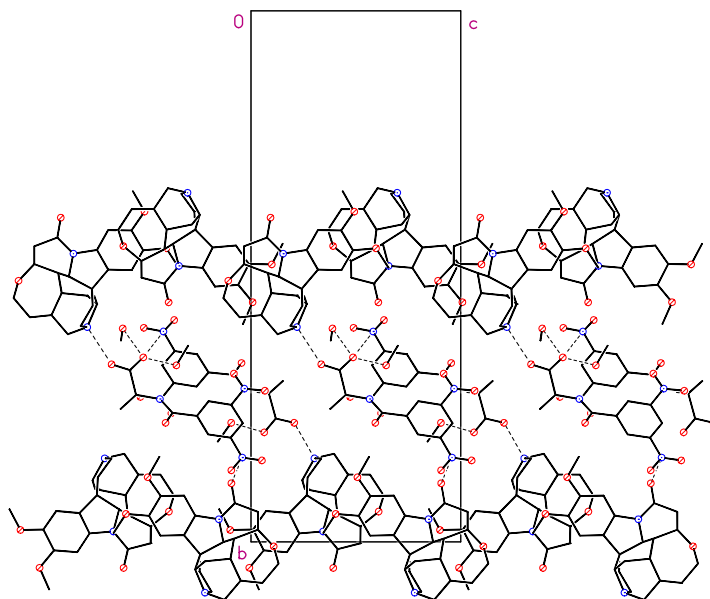

Supplement: b605203g.pdf [file b605203g.pdf]
